# Supplementary material
Source: publisher site journal article supplement (https://www.dovepress.com/article/378212)
Supplement: Supplementary file 1 [file get_supplementary_file.php]

**Table S1** Correlation between CYP19A1 and markers of various immune cells in the TIMER database

| Description            | Gene markers       | STAD   |        |        |        |
|------------------------|--------------------|--------|--------|--------|--------|
|                        |                    | None   |        | Purity |        |
|                        |                    | Cor    | P      | Cor    | P      |
| CD8+ T cell            | CD8A               | -0.059 | 0.228  | -0.077 | 0.136  |
|                        | CD8B               | 0.013  | 0.799  | 0.003  | 0.947  |
| T cell (general)       | CD3D               | -0.062 | 0.205  | -0.081 | 0.116  |
|                        | CD3E               | -0.075 | 0.126  | -0.1   | 0.0508 |
|                        | CD2                | -0.05  | 0.303  | -0.068 | 0.188  |
| B cell                 | CD19               | 0.042  | 0.398  | 0.03   | 0.563  |
|                        | CD79A              | 0.011  | 0.826  | 0.003  | 0.957  |
| Monocyte               | CD86               | 0.085  | 0.0836 | 0.07   | 0.172  |
|                        | CD115(CSF1R)       | 0.164  | ***    | 0.147  | **     |
| TAM                    | CCL2               | 0.178  | ***    | 0.16   | **     |
|                        | CD68               | 0.031  | 0.531  | 0.009  | 0.86   |
|                        | IL10               | 0.189  | **     | 0.162  | **     |
| M1                     | INOS(NOS2)         | -0.017 | 0.727  | -0.037 | 0.471  |
| Macrophage             | IRF5               | 0.129  | **     | 0.108  | *      |
|                        | COX2(PTGS2)        | 0.102  | **     | 0.075  | 0.145  |
| M2                     | CD163              | 0.15   | **     | 0.131  | **     |
| Macrophage             | VSIG4              | 0.14   | **     | 0.129  | **     |
|                        | MS4A4A             | 0.167  | ***    | 0.155  | **     |
| Neutrophils            | CD66b(CEACAM<br>8) | 0.186  | ***    | 0.188  | ***    |
|                        | CD111b(ITGAM)      | 0.157  | **     | 0.148  | **     |
|                        | CCR7               | 0.086  | 0.0805 | 0.073  | 0.154  |
| Natural killer<br>cell | KIR2DL1            | 0.067  | 0.172  | 0.057  | 0.266  |
|                        | KIR2DL3            | -0.023 | 0.64   | -0.045 | 0.383  |
|                        | KIR2DL4            | -0.073 | 0.136  | -0.092 | 0.073  |
|                        | KIR3DL1            | 0.037  | 0.458  | 0.032  | 0.54   |
|                        | KIR3DL2            | -0.047 | 0.335  | -0.058 | 0.262  |
|                        | KIR3DL3            | 0.04   | 0.412  | 0.051  | 0.325  |
|                        | KIR2DS4            | -0.033 | 0.497  | -0.038 | 0.46   |
| Dendritic cell         | HLA-DPB1           | -0.048 | 0.327  | -0.067 | 0.194  |
|                        | HLA-DQB1           | -0.05  | 0.312  | -0.079 | 0.124  |
|                        | HLA-DRA            | -0.075 | 0.125  | -0.093 | 0.0712 |
|                        | HLA-DPA1           | -0.077 | 0.117  | -0.093 | 0.0697 |
|                        | BDCA-1(CD1C)       | 0.19   | ***    | 0.186  | **     |
|                        | BDCA-4(NRP1)       | 0.285  | ***    | 0.265  | ***    |
|                        | CD11c(ITGAX)       | 0.115  | *      | 0.095  | 0.0652 |
| Th1                    | T-bet(TBX21)       | -0.05  | 0.313  | -0.075 | 0.144  |
|                        | STAT4              | 0.075  | 0.126  | 0.068  | 0.188  |
|                        | STAT1              | -0.03  | 0.539  | -0.044 | 0.391  |

|            |                      |        |        |        |       |
|------------|----------------------|--------|--------|--------|-------|
|            | IFN- $\gamma$ (IFNG) | -0.14  | **     | -0.157 | **    |
|            | TNF- $\alpha$ (TNF)  | -0.055 | 0.254  | -0.083 | 0.108 |
| Th2        | GATA3                | 0.118  | **     | 0.128  | **    |
|            | STAT6                | 0.082  | 0.0963 | 0.082  | 0.109 |
|            | STAT5A               | 0.135  | **     | 0.127  | **    |
|            | IL13                 | 0.105  | *      | 0.126  | **    |
| Tfh        | BCL6                 | 0.216  | ***    | 0.211  | ***   |
|            | IL21                 | -0.048 | 0.33   | -0.05  | 0.335 |
| Th17       | STAT3                | 0.117  | *      | 0.106  | *     |
|            | IL17A                | -0.153 | **     | -0.172 | ***   |
| Treg       | FOXP3                | -0.002 | 0.969  | -0.023 | 0.649 |
|            | CCR8                 | 0.103  | *      | 0.09   | *     |
|            | STAT5B               | 0.257  | ***    | 0.241  | ***   |
|            | TGF $\beta$ (TGFB1)  | 0.252  | ***    | 0.256  | ***   |
| T cell     | PD-1(PDCD1)          | -0.062 | 0.207  | -0.069 | 0.18  |
| exhaustion | CTLA4                | -0.024 | 0.632  | -0.039 | 0.445 |
|            | LAG3                 | -0.111 | *      | -0.139 | *     |
|            | TIM-3(HAVCR2)        | 0.106  | *      | 0.091  | 0.078 |
|            | GZMB                 | -0.174 | **     | -0.207 | ***   |

\* $P < 0.05$ ; \*\* $P < 0.01$ ; \*\*\* $P < 0.001$ .
